# Supplementary material for: Unveiling the Role of Non-Structural Supramolecular Water Assisted Coupling of Pyrroles and Isocyanates to Amidopyrroles
Source: Royal Society of Chemistry journal article supplement (doi:10.1039/d5cp01713k), 2026-01-01
Supplement: d5cp01713k1.pdf [file d5cp01713k1.pdf]

## Supplementary Information

### **Unveiling the Role of Non-Structural Supramolecular Water Assisted Coupling of Pyrroles and Isocyanates to Amidopyrroles**

Sanat Kumar Mahapatra,<sup>a</sup> Bijoy Ghosh,<sup>b</sup> and Lisa Roy<sup>\*b</sup>

---

<sup>a</sup> *Institute of Chemical Technology Mumbai – IOC Odisha Campus Bhubaneswar, Bhubaneswar 751013, India.*

<sup>b</sup> *Department of Education, Indian Institute of Technology Kharagpur, Kharagpur 721302, India. Email: L.Roy@edu.iitkgp.ac.in*

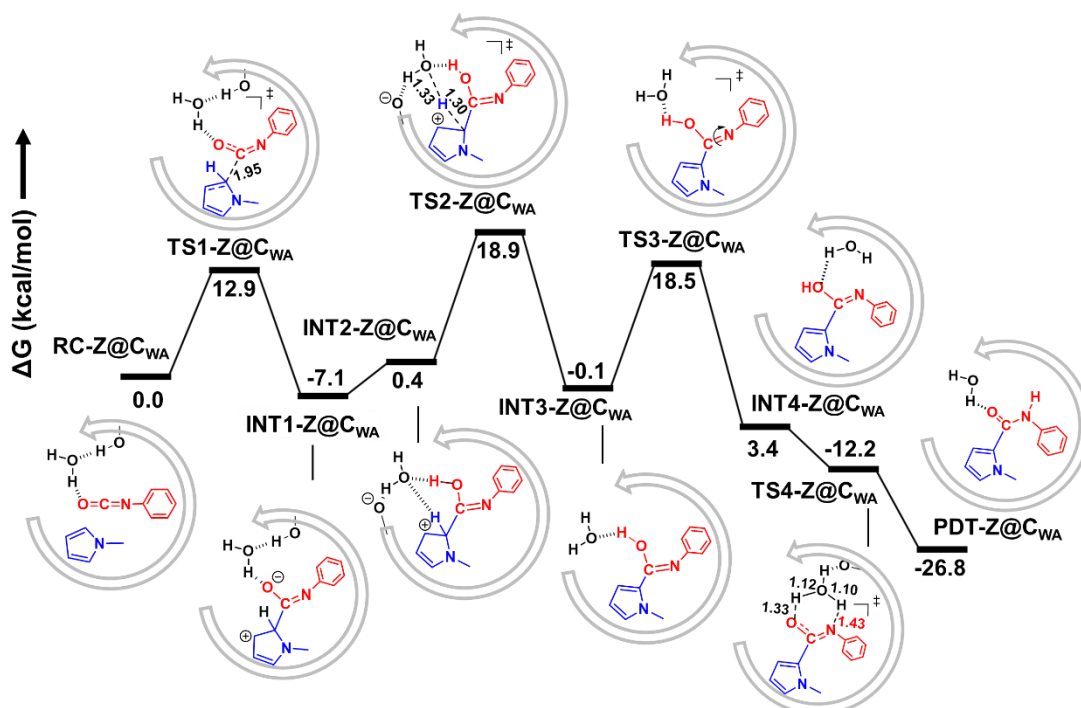

**Figure S1.** Gibbs free energy profiles in kcal/mol at B3LYP-D3BJ/Def2-TZVP/CPCM(CHCl<sub>3</sub>:H<sub>2</sub>O=1:1) for the coupling of **2a** and **3a** to Z-selective **4aa** inside capsule (**C**) with water-assistance (**C<sub>WA</sub>**). Notably, the pyrrolic C-H activation via **TS2-Z@C<sub>WA</sub>** featuring an activation free energy of ~ 26.0 kcal/mol is non-competitive with the other pathways with monomer and capsule assistance, in presence or absence of water, and has not been discussed in the main text.

**Table S1.** Binding energies of different reactant complexes calculated at B3LYP-D3BJ/Def2-TZVP/CPCM(Chloroform).

| Reactant Complex   | Binding Energy in kcal/mol |
|--------------------|----------------------------|
| RC@S <sub>U</sub>  | -3.4                       |
| RC@S <sub>WA</sub> | -9.3                       |
| RC@M <sub>U</sub>  | -21.0                      |
| RC@M <sub>WA</sub> | -21.2                      |
| RC@C <sub>WA</sub> | -12.2                      |
| RC@C <sub>U</sub>  | -19.4                      |

| Reactant Complex <sup>a</sup> | Binding Energy in kcal/mol |
|-------------------------------|----------------------------|
| RC@C <sub>WA_1</sub>          | -46.2                      |
| RC@C <sub>2WA_1</sub>         | -58.0                      |
| RC@C <sub>3WA_1</sub>         | -77.1                      |
| RC@C <sub>U_1</sub>           | -42.0                      |

<sup>a</sup> Computed at B3LYP-D3BJ/Def2-TZVP/ALPB(CHCl<sub>3</sub>) on ONIOM[B3LYP-D3(BJ)/ALPB(CHCl<sub>3</sub>)/def2-SVP:XTB] optimized geometries with ORCA 5.0.3 software.<sup>1</sup>

**Table S2.** Calculated relative free energy ( $\Delta G$ ) for all species with different functionals in mixed solvent.

| Entry    | Stationary State           | M062X/Def2-TZVP/CPCM<br>(CHCl <sub>3</sub> :H <sub>2</sub> O=1:1) | B3LYP-D3BJ/Def2-TZVP/CPCM<br>(CHCl <sub>3</sub> :H <sub>2</sub> O=1:1) | B3LYP/Def2-TZVP/CPCM<br>(CHCl <sub>3</sub> :H <sub>2</sub> O=1:1) |
|----------|----------------------------|-------------------------------------------------------------------|------------------------------------------------------------------------|-------------------------------------------------------------------|
| <b>1</b> | <b>Separated Reactants</b> | 0.0                                                               | 0.0                                                                    | 0.0                                                               |
|          | RC@S <sub>U</sub>          | 3.1                                                               | 1.1                                                                    | 3.1                                                               |
|          | TS1@S <sub>U</sub>         | 27.1                                                              | 22.5                                                                   | 26.7                                                              |
|          | INT1@S <sub>U</sub>        | 26.1                                                              | 22.1                                                                   | 25.9                                                              |
|          | TS2@S <sub>U</sub>         | 47.8                                                              | 41.5                                                                   | 27.3                                                              |
|          | PDT@S <sub>U</sub>         | -10.5                                                             | -12.3                                                                  | -8.9                                                              |
| <b>2</b> | <b>Separated Reactants</b> | 0.0                                                               | 0.0                                                                    | 0.0                                                               |
|          | RC@S <sub>WA</sub>         | 9.9                                                               | 1.0                                                                    | 9.9                                                               |
|          | TS1@S <sub>WA</sub>        | 32.2                                                              | 21.4                                                                   | 34.2                                                              |
|          | INT1@S <sub>WA</sub>       | 27.5                                                              | 17.6                                                                   | 30.1                                                              |
|          | TS2@S <sub>WA</sub>        | 38.4                                                              | 26.0                                                                   | 36.5                                                              |
|          | PDT@S <sub>WA</sub>        | -4.0                                                              | -13.1                                                                  | -5.2                                                              |
| <b>3</b> | <b>Separated Reactants</b> | 0.0                                                               | 0.0                                                                    | 0.0                                                               |
|          | RC@M <sub>U</sub>          | -5.1                                                              | -6.7                                                                   | 32.7                                                              |
|          | TS1@M <sub>U</sub>         | 14.7                                                              | 13.2                                                                   | 38.2                                                              |
|          | INT1@M <sub>U</sub>        | 5.5                                                               | -4.1                                                                   | 28.5                                                              |
|          | TS2@M <sub>U</sub>         | 11.1                                                              | 1.2                                                                    | 29.9                                                              |
|          | PDT@M <sub>U</sub>         | -18.7                                                             | -20.7                                                                  | 11.0                                                              |
| <b>4</b> | <b>Separated Reactants</b> | 0.0                                                               | 0.0                                                                    | 0.0                                                               |
|          | RC@M <sub>WA</sub>         | -5.4                                                              | -9.0                                                                   | 31.0                                                              |
|          | TS1@M <sub>WA</sub>        | 8.8                                                               | 5.2                                                                    | 45.7                                                              |
|          | INT1@M <sub>WA</sub>       | -0.6                                                              | -7.9                                                                   | 37.7                                                              |
|          | TS2@M <sub>WA</sub>        | 7.9                                                               | -0.4                                                                   | 37.1                                                              |
|          | PDT@M <sub>WA</sub>        | -25.5                                                             | -29.5                                                                  | 12.0                                                              |
| <b>5</b> | RC@C <sub>U</sub>          | 0.0                                                               | 0.0                                                                    | 0.0                                                               |
|          | TS1@C <sub>U</sub>         | 20.0                                                              | 20.1                                                                   | 19.6                                                              |
|          | INT1@C <sub>U</sub>        | 3.7                                                               | -1.9                                                                   | -4.3                                                              |

|   |                        |       |       |       |
|---|------------------------|-------|-------|-------|
|   | TS2@C <sub>U</sub>     | 12.2  | 5.0   | 3.9   |
|   | PDT@C <sub>U</sub>     | -16.6 | -14.3 | -18.4 |
| 6 | RC@C <sub>WA</sub>     | 0.0   | 0.0   | 0.0   |
|   | TS1@C <sub>WA</sub>    | 18.3  | 15.2  | 16.9  |
|   | INT1@C <sub>WA</sub>   | 0.7   | -6.1  | -6.0  |
|   | TS2@C <sub>WA</sub>    | 3.3   | -3.3  | -3.4  |
|   | PDT@C <sub>WA</sub>    | -33.6 | -32.9 | -29.0 |
| 7 | RC-Z@C <sub>WA</sub>   | 0.0   | 0.0   | 0.0   |
|   | TS1-Z@C <sub>WA</sub>  | 16.2  | 13.3  | 12.3  |
|   | INT1-Z@C <sub>WA</sub> | -2.9  | -4.8  | -6.8  |
|   | INT2-Z@C <sub>WA</sub> | 2.3   | 2.0   | 3.9   |
|   | TS2-Z@C <sub>WA</sub>  | 21.9  | 21.2  | 17.8  |
|   | INT3-Z@C <sub>WA</sub> | -1.7  | 0.3   | -17.0 |
|   | TS3-Z@C <sub>WA</sub>  | 17.2  | 18.4  | 0.1   |
|   | INT4-Z@C <sub>WA</sub> | -7.6  | -3.2  | -14.6 |
|   | TS4-Z@C <sub>WA</sub>  | -14.0 | -11.7 | -20.8 |
|   | PDT-Z@C <sub>WA</sub>  | -26.2 | -26.9 | -36.7 |

**Table S3.** Calculated relative free energy ( $\Delta G$ ) for all species with different functionals in chloroform

| Entry | Stationary State     | M062X/Def2-TZVP/CPCM (CHCl <sub>3</sub> ) | B3LYP-D3BJ/Def2-TZVP/CPCM (CHCl <sub>3</sub> ) | B3LYP/Def2-TZVP/CPCM (CHCl <sub>3</sub> ) |
|-------|----------------------|-------------------------------------------|------------------------------------------------|-------------------------------------------|
| 1     | RC@S <sub>U</sub>    | 0.0                                       | 0.0                                            | 0.0                                       |
|       | TS1@S <sub>U</sub>   | 23.3                                      | 22.9                                           | 23.0                                      |
|       | INT1@S <sub>U</sub>  | 23.2                                      | 22.4                                           | 22.8                                      |
|       | TS2@S <sub>U</sub>   | 43.9                                      | 41.3                                           | 40.3                                      |
|       | PDT@S <sub>U</sub>   | -15.3                                     | -13.2                                          | -13.7                                     |
| 2     | RC@S <sub>WA</sub>   | 0.0                                       | 0.0                                            | 0.0                                       |
|       | TS1@S <sub>WA</sub>  | 16.1                                      | 15.8                                           | 18.1                                      |
|       | INT1@S <sub>WA</sub> | 13.1                                      | 13.6                                           | 15.4                                      |
|       | TS2@S <sub>WA</sub>  | 23.1                                      | 21.4                                           | 21.1                                      |
|       | PDT@S <sub>WA</sub>  | -18.9                                     | -18.0                                          | -20.1                                     |
| 3     | RC@M <sub>U</sub>    | 0.0                                       | 0.0                                            | 0.0                                       |

|          |                              |       |       |       |
|----------|------------------------------|-------|-------|-------|
|          | <b>TS1@M<sub>U</sub></b>     | 15.9  | 15.4  | 16.6  |
|          | <b>INT1@M<sub>U</sub></b>    | 8.7   | 2.0   | 11.5  |
|          | <b>TS2@M<sub>U</sub></b>     | 13.4  | 6.4   | -0.6  |
|          | <b>PDT@M<sub>U</sub></b>     | -17.3 | -16.3 | -20.3 |
| <b>4</b> | <b>RC@M<sub>WA</sub></b>     | 0.0   | 0.0   | 0.0   |
|          | <b>TS1@M<sub>WA</sub></b>    | 10.7  | 9.3   | 11.1  |
|          | <b>INT1@M<sub>WA</sub></b>   | 3.5   | -0.3  | 5.3   |
|          | <b>TS2@M<sub>WA</sub></b>    | 10.7  | 5.9   | 3.3   |
|          | <b>PDT@M<sub>WA</sub></b>    | -23.9 | -24.3 | -11.3 |
| <b>5</b> | <b>RC@C<sub>U</sub></b>      | 0.0   | 0.0   | 0.0   |
|          | <b>TS1@C<sub>U</sub></b>     | 21.4  | 19.0  | 21.6  |
|          | <b>INT1@C<sub>U</sub></b>    | 6.3   | 0.5   | -1.8  |
|          | <b>TS2@C<sub>U</sub></b>     | 13.6  | 6.5   | 5.3   |
|          | <b>PDT@C<sub>U</sub></b>     | -15.1 | -12.8 | -16.8 |
| <b>6</b> | <b>RC@C<sub>WA</sub></b>     | 0.0   | 0.0   | 0.0   |
|          | <b>TS1@C<sub>WA</sub></b>    | 18.9  | 15.7  | 17.5  |
|          | <b>INT1@C<sub>WA</sub></b>   | 0.7   | -5.5  | -5.4  |
|          | <b>TS2@C<sub>WA</sub></b>    | 3.9   | -2.6  | -2.7  |
|          | <b>PDT@C<sub>WA</sub></b>    | -32.9 | -32.2 | -28.3 |
| <b>7</b> | <b>RC-Z@C<sub>WA</sub></b>   | 0.0   | 0.0   | 0.0   |
|          | <b>TS1-Z@C<sub>WA</sub></b>  | 16.8  | 13.7  | 15.9  |
|          | <b>INT1-Z@C<sub>WA</sub></b> | -0.1  | -2.2  | -4.1  |
|          | <b>INT2-Z@C<sub>WA</sub></b> | 4.4   | 4.0   | 6.0   |
|          | <b>TS2-Z@C<sub>WA</sub></b>  | 23.7  | 22.9  | 23.3  |
|          | <b>INT3-Z@C<sub>WA</sub></b> | -0.5  | 1.3   | -16.0 |
|          | <b>TS3-Z@C<sub>WA</sub></b>  | 18.2  | 19.2  | 1.4   |
|          | <b>INT4-Z@C<sub>WA</sub></b> | -7.4  | -3.2  | -14.6 |
|          | <b>TS4-Z@C<sub>WA</sub></b>  | -13.5 | -11.4 | -20.4 |
|          | <b>PDT-Z@C<sub>WA</sub></b>  | -25.2 | -26.1 | -36.9 |

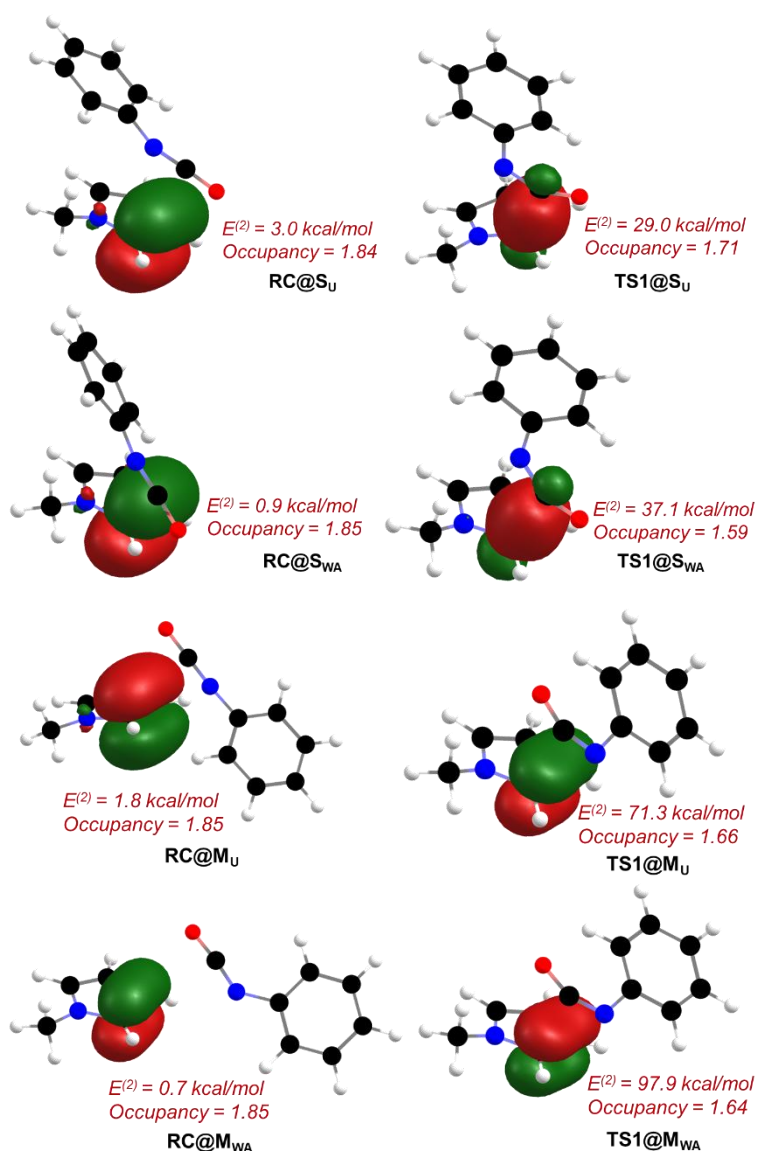

**Figure S2:** Plots of the donor natural bond orbitals in fragments of the reactant complexes and transition states for the coupling of **2a** and **3a** to **4aa** in implicit solvent (S) and assisted by a resorcin-arene monomer (M). Second order perturbation theory energies and orbital-occupancy at B3LYP/D3(BJ)/6-31G(d,p) level of theory are shown.

**Table S4:** Calculated electrophilicity ( $\omega^+$ ) in fragments of the intermediate in different chemical environment.

| 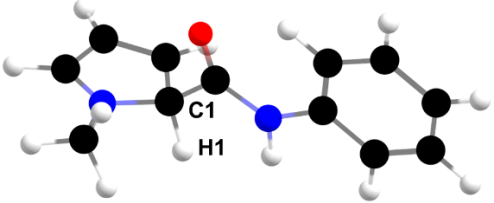 |                                                     |
|--------------------------------------------------------------------------------------|-----------------------------------------------------|
| Stationary State                                                                     | Electrophilicity ( $\omega^+$ ) on C1-H1 unit in eV |
| INT1@M <sub>U</sub>                                                                  | 14.8                                                |
| INT1@M <sub>WA</sub>                                                                 | 15.0                                                |
| INT1@C <sub>U</sub>                                                                  | 13.7                                                |
| INT1@C <sub>WA</sub>                                                                 | 15.1                                                |

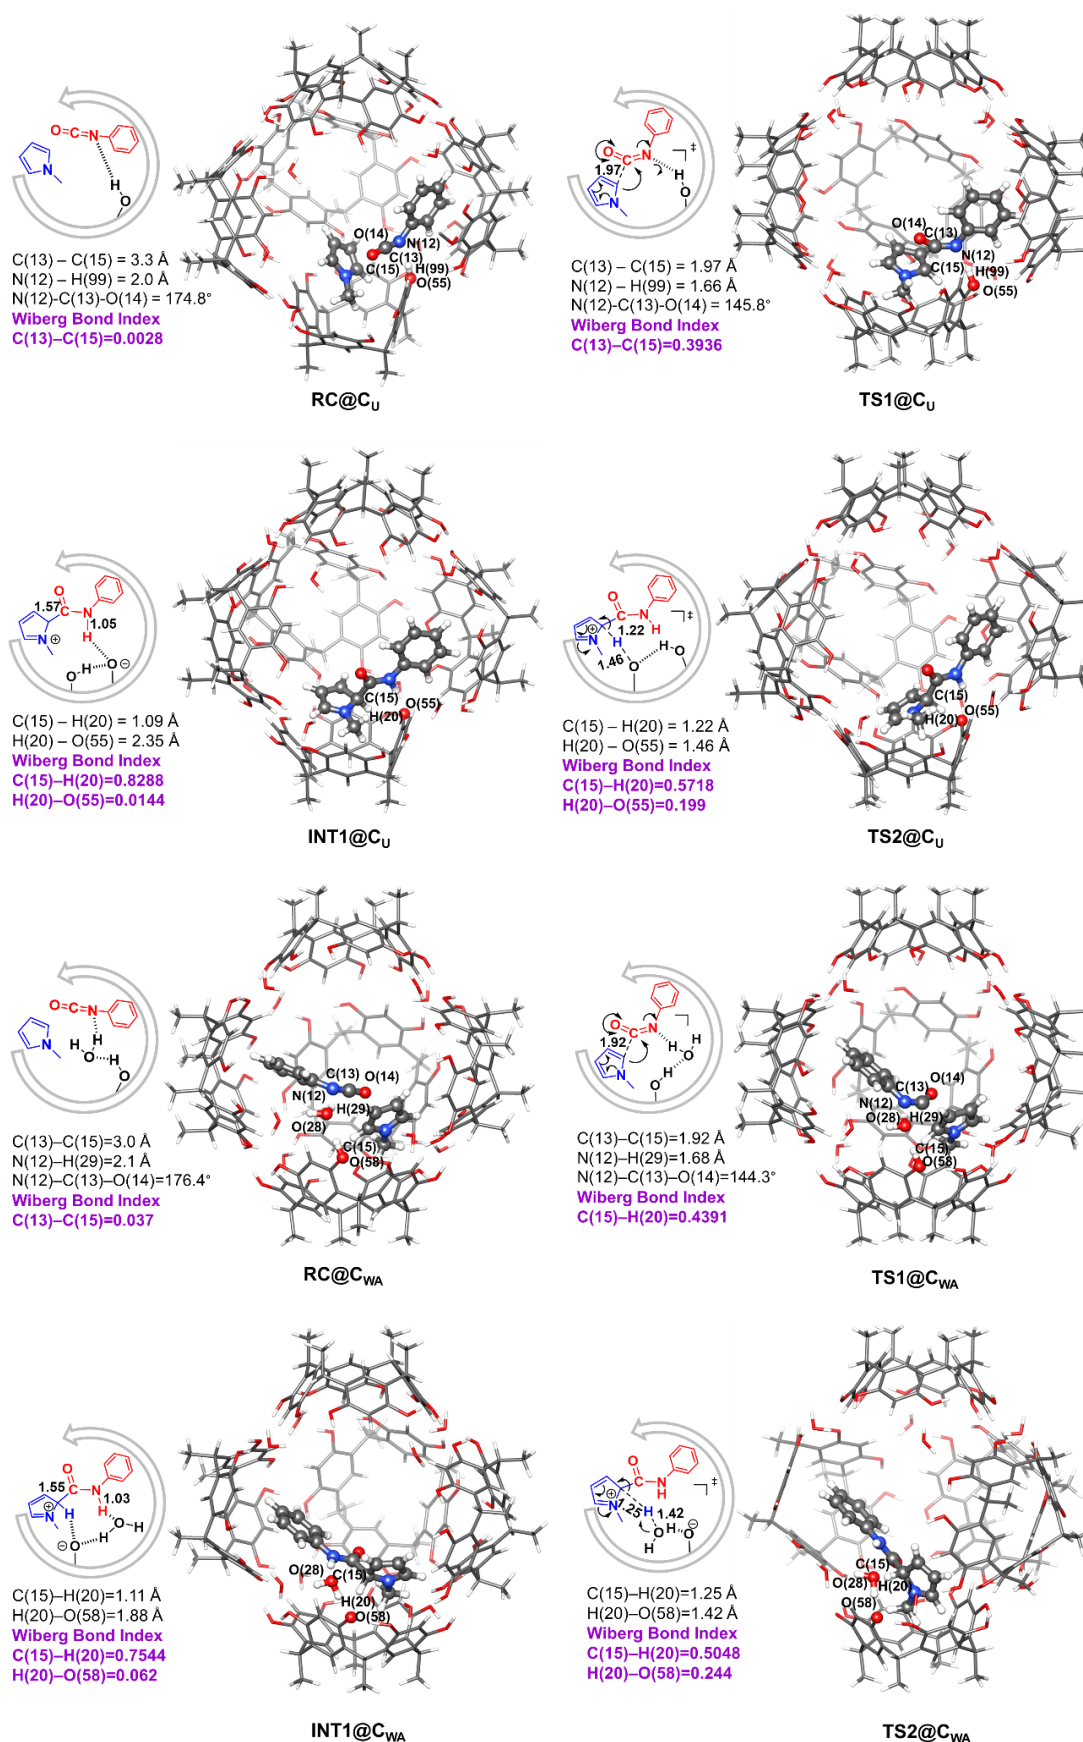

**Figure S3:** Optimized geometries and calculated Wiberg Bond Indices of stationary states, in presence or absence of additional water. One of the resorcin-arene monomers are not shown for clarity.

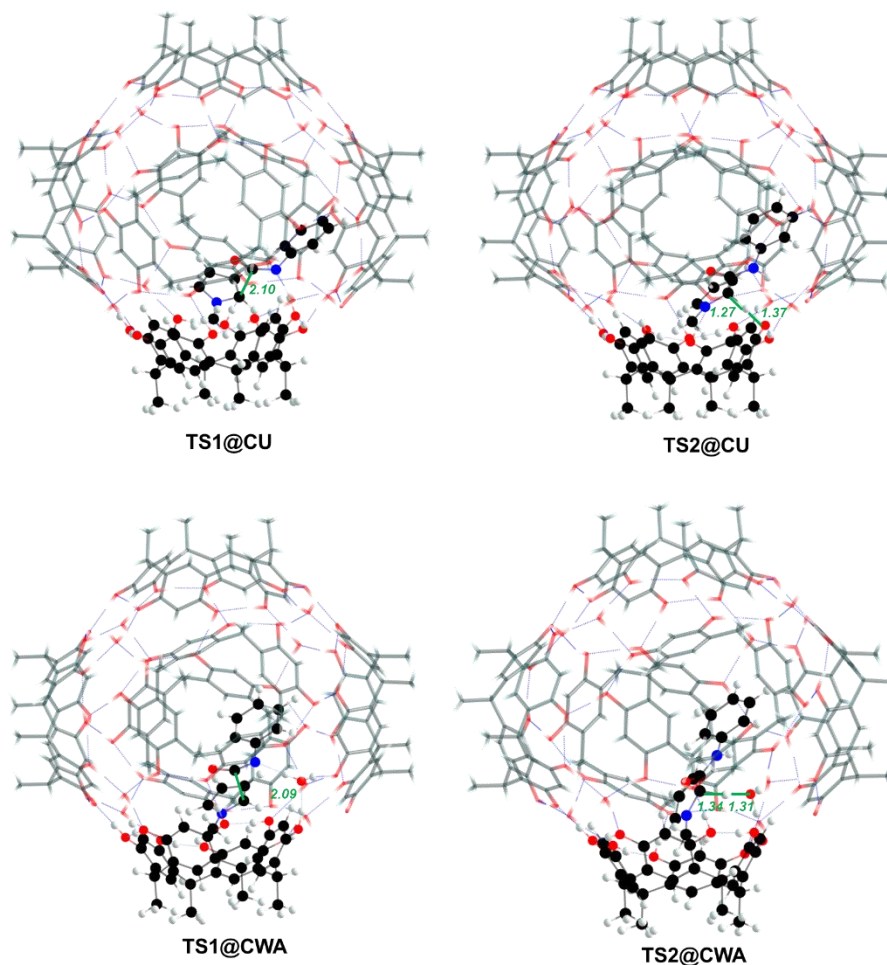

**Figure S4.** 2-layer ONIOM method used for optimizations at M06-2X/6-31G(d,p)//PM6 level of theory. Ball and stick represent High-Level and Thin sticks represents Low-Level.

**Table S5.** S-value Test (Energies are in units of Hartree).

| S. No. |                                      | $E^{\text{PM6}}$ | $E^{\text{M06-2X/6-31(d,p)}}$ | $S_{\text{low}} = E_{\text{low,real}} - E_{\text{low,model}}$ | $S_{\text{high}} = E_{\text{high,real}} - E_{\text{high,model}}$ | Err = $S_{\text{low}} - S_{\text{high}}$ |
|--------|--------------------------------------|------------------|-------------------------------|---------------------------------------------------------------|------------------------------------------------------------------|------------------------------------------|
| 1      | RC@C <sub>U</sub> <sup>real</sup>    | -3.8598136       | -12299.20774                  | 0.010508326                                                   | 0.00735259                                                       | 0.003155736                              |
|        | RC@C <sub>U</sub> <sup>model</sup>   | -0.4200407       | -2488.77442                   |                                                               |                                                                  |                                          |
|        | INT1@C <sub>U</sub> <sup>real</sup>  | -3.8345726       | -12299.18988                  |                                                               |                                                                  |                                          |
|        | INT1@C <sub>U</sub> <sup>model</sup> | -0.405308        | -2488.763914                  |                                                               |                                                                  |                                          |
| 2      | RC@C <sub>WA</sub> <sup>real</sup>   | -3.9651628       | -12375.60123                  | -0.004254494                                                  | -0.01244567                                                      | 0.008191176                              |
|        | RC@C <sub>WA</sub> <sup>model</sup>  | -0.5177151       | -2565.169098                  |                                                               |                                                                  |                                          |
|        | INT1@C <sub>WA</sub> <sup>real</sup> | -3.9616831       | -12375.60378                  |                                                               |                                                                  |                                          |
|        | INT1@C <sub>U</sub> <sup>model</sup> | -0.5099808       | -2565.159201                  |                                                               |                                                                  |                                          |

The S-value test is a crucial diagnostic feature to demonstrate the accuracy of the chosen methodology in a two-level ONIOM2 calculation based on integrated molecular orbital + molecular orbital hypothesis, i.e. whether the two levels correctly describe the electronic effect or the “substituent effect” of the large system. It describes the amount of error (Err) incurred in avoiding the high-level calculation for the real system.<sup>2-3</sup> Here the following partitioning is utilized:



$$\text{Err} = E_{\text{ONIOM2}(\text{high:low})} - E_{\text{high,real}} \quad (1)$$

$$\begin{aligned} \text{Err} &= (E_{\text{high,model}} + E_{\text{low,real}} - E_{\text{low,model}}) - E_{\text{high,real}} \\ &= (E_{\text{low,real}} - E_{\text{low,model}}) - (E_{\text{high,real}} - E_{\text{high,model}}) \end{aligned}$$

The S-values (substituent-values) for high- and low-level methodology are then defined as follows

$$S_{\text{low}} = E_{\text{low,real}} - E_{\text{low,model}}$$

$$S_{\text{high}} = E_{\text{high,real}} - E_{\text{high,model}}$$

Thus, if  $S_{\text{low}}$  is equal to  $S_{\text{high}}$ , the ONIOM2 approximation with the QM2 (low-level method) has no error.  $\Delta S$ -value or Err-value has been calculated for two cases: for the C-C coupling within capsules with and without assistance of non-structural supramolecular water molecule. As observed from Table S5, the Err-value is ~0 for both the cases suggesting that the low-level method PM6 can be appropriately used in combination with the present high-level method, M06-2X/6-31(d,p) for geometry optimizations. This strongly confirms the reliability of the chosen high- and low-level methodology in our study.

**Table S6.** Reaction energies for optimization in bulk solvent. Energies reported are in kcal/mol.

|                      | $\Delta G$ (B3LYP-D3BJ/def2-TZVP/CPCM(Chloroform:H <sub>2</sub> O=1:1)) | $\Delta G$ (B3LYP-D3BJ/Def2-TZVP/CPCM(CHCl <sub>3</sub> :H <sub>2</sub> O=1:1)//M06-2X/CPCM(CHCl <sub>3</sub> )/6-31G(d,p)) |
|----------------------|-------------------------------------------------------------------------|-----------------------------------------------------------------------------------------------------------------------------|
| RC@S <sub>U</sub>    | 1.1                                                                     | 1.1                                                                                                                         |
| TS1@S <sub>U</sub>   | 22.2                                                                    | 22.5                                                                                                                        |
| INT1@S <sub>U</sub>  | 22.1                                                                    | 22.1                                                                                                                        |
| TS2@S <sub>U</sub>   | 41.6                                                                    | 41.5                                                                                                                        |
| PDT@S <sub>U</sub>   | -12.9                                                                   | -12.3                                                                                                                       |
|                      |                                                                         |                                                                                                                             |
| RC@S <sub>WA</sub>   | -1.4                                                                    | 1.0                                                                                                                         |
| TS1@S <sub>WA</sub>  | 19.6                                                                    | 21.4                                                                                                                        |
| INT1@S <sub>WA</sub> | 15.9                                                                    | 17.6                                                                                                                        |
| TS2@S <sub>WA</sub>  | 24.8                                                                    | 26.0                                                                                                                        |
| PDT@S <sub>WA</sub>  | -14.5                                                                   | -13.1                                                                                                                       |

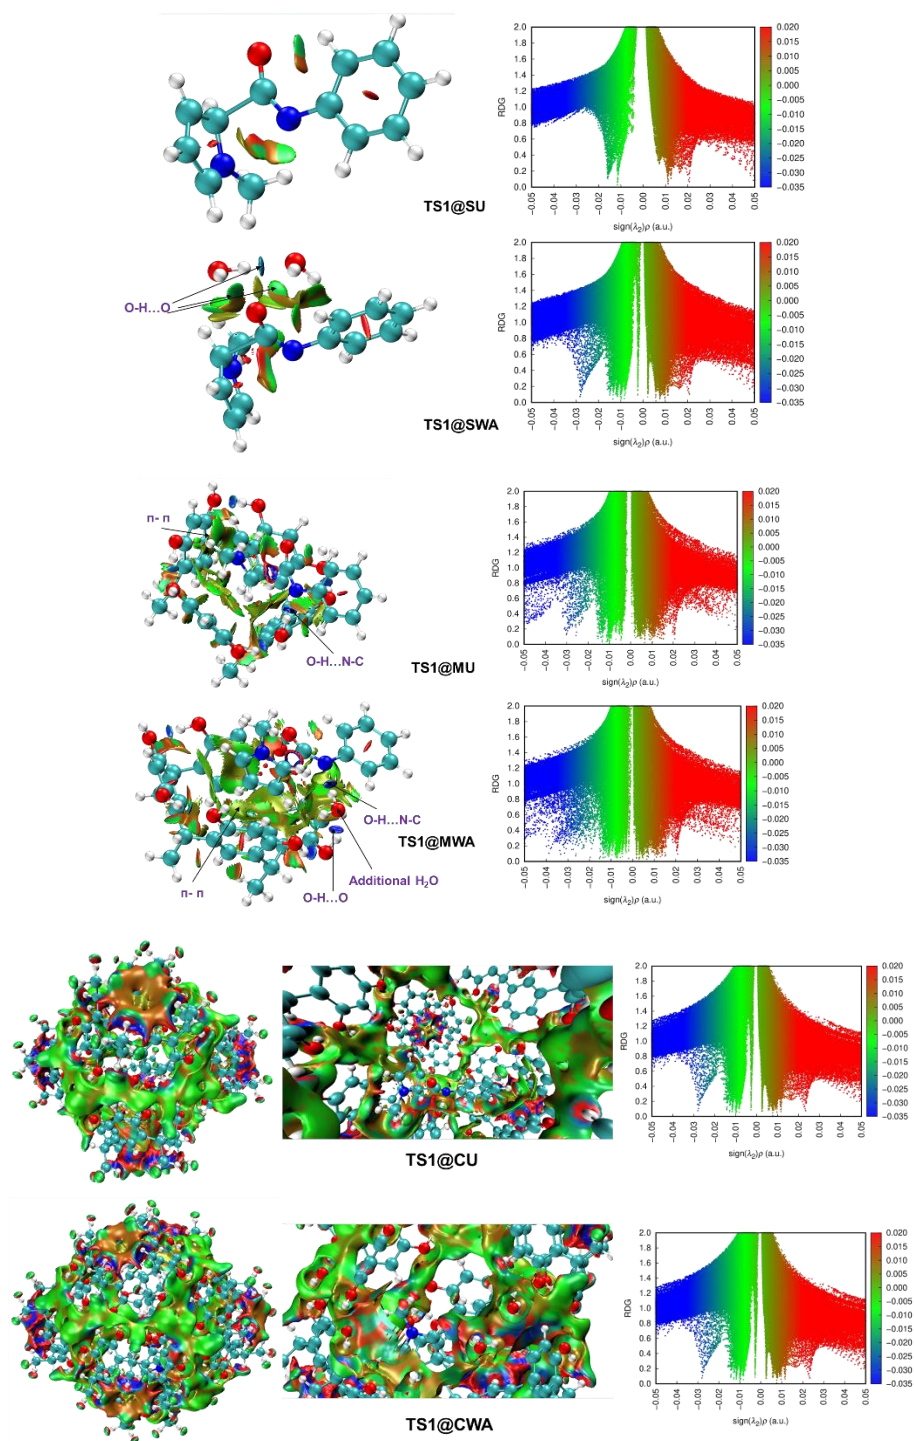

**Figure S5.** NCIs and RDG plots in transition states for C-C coupling.

## References

1. F. Neese, *Wiley Interdiscip. Rev. Comput. Mol. Sci.* 2022, **12**, e1606.
2. L. W. Chung, W. M. C. Sameera, R. Ramozzi, A. J. Page, M. Hatanaka, G. P. Petrova, T. V. Harris, X. Li, Z. Ke, F. Liu, H.-B. Li, L. Ding and K. Morokuma, *Chem. Rev.* 2015, **115**, 5678.
3. T. Vreven, K. Morokuma, *J. Comput. Chem.* 2000, **21**, 1419
